# Supplementary material for: Two-dimensional Cr2GaX4 (X = S, Se, Te) monolayers: half-metallic intrinsic room temperature ferromagnets with large magnetic anisotropy
Source: Royal Society of Chemistry journal article supplement (doi:10.1039/d3tc03845a), 2024-01-01
Supplement: d3tc03845a1.pdf [file d3tc03845a1.pdf]

**Supporting Information for**  
**Two dimensional Cr<sub>2</sub>GaX<sub>4</sub> (X = S, Se, Te): Half-Metallic Intrinsic**  
**Room Temperature Ferromagnets with Large Magnetic Anisotropy**

Sai Ma,<sup>1,\*</sup> Xiangyan Bo,<sup>1,\*</sup> Xiaoyu Liu,<sup>1</sup> Suen Wang,<sup>1</sup> Mengxian Lan,<sup>1</sup> Shasha Li,<sup>1,†</sup>  
Feng Li,<sup>1,†</sup> and Yong Pu<sup>1,†</sup>

<sup>1</sup> *School of Science & New Energy Technology Engineering Laboratory of Jiangsu Province, Nanjing University of Posts and Telecommunications (NJUPT), Nanjing 210046, China*

Corresponding Authors: shashali@njupt.edu.cn; lifeng@njupt.edu.cn;  
puyong@njupt.edu.cn

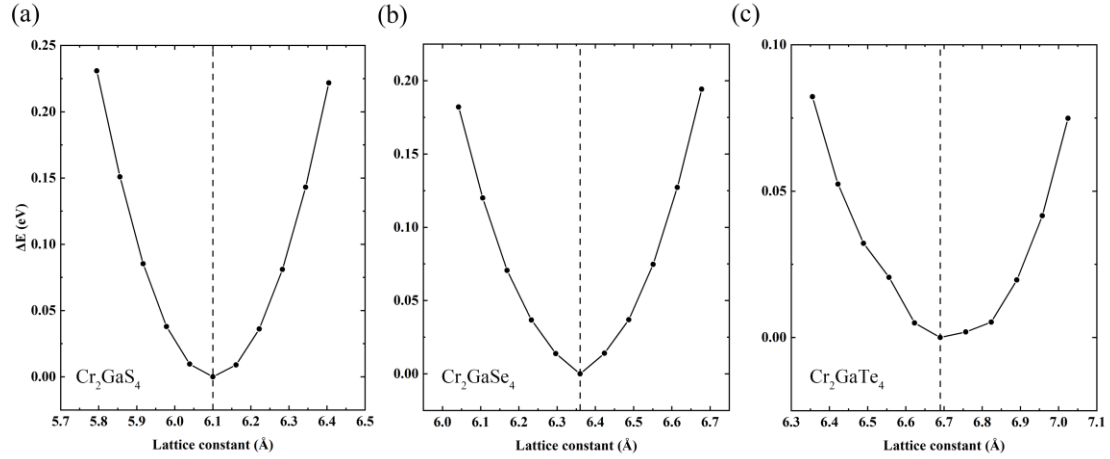

Figure S1: Total energy as a function of lattice constants in the ferromagnetic configurations of (a)  $\text{Cr}_2\text{GaS}_4$ , (b)  $\text{Cr}_2\text{GaSe}_4$ , and (c)  $\text{Cr}_2\text{GaTe}_4$  monolayers.

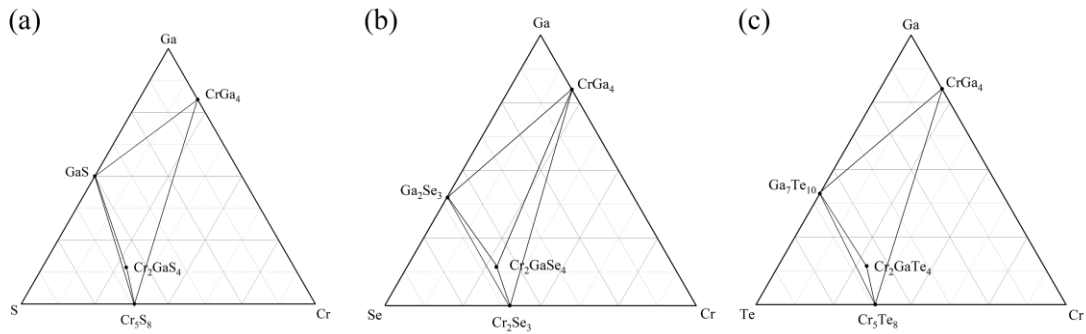

Figure S2: The phase diagram of a ternary (a) Cr-Ga-S, (b) Cr-Ga-Se, and (c) Cr-Ga-Te system.

Table S1: The optimized lattice constants ( $L$ , Å), the Cr-Ga bond lengths ( $d_1$ , Å), the Cr-X bond lengths ( $d_2$ , Å), the Cr-Ga-Cr bond angles ( $\theta_1$ ), the Cr-X-Cr bond angles ( $\theta_2$ ), and the stiffness constants ( $C$ , N/m).

|                            | $L$  | $d_1$ | $d_2$ | $\theta_1$ | $\theta_2$ | $C_{11}$ | $C_{12}$ | $C_{66}$ |
|----------------------------|------|-------|-------|------------|------------|----------|----------|----------|
| $\text{Cr}_2\text{GaS}_4$  | 6.10 | 3.05  | 2.40  | 90         | 128.26     | 13.39    | -0.328   | 6.608    |
| $\text{Cr}_2\text{GaSe}_4$ | 6.36 | 3.19  | 2.53  | 90         | 125.63     | 6.509    | 0.772    | 5.931    |
| $\text{Cr}_2\text{GaTe}_4$ | 6.69 | 3.35  | 2.73  | 90         | 120.24     | 3.761    | -1.35    | 6.115    |

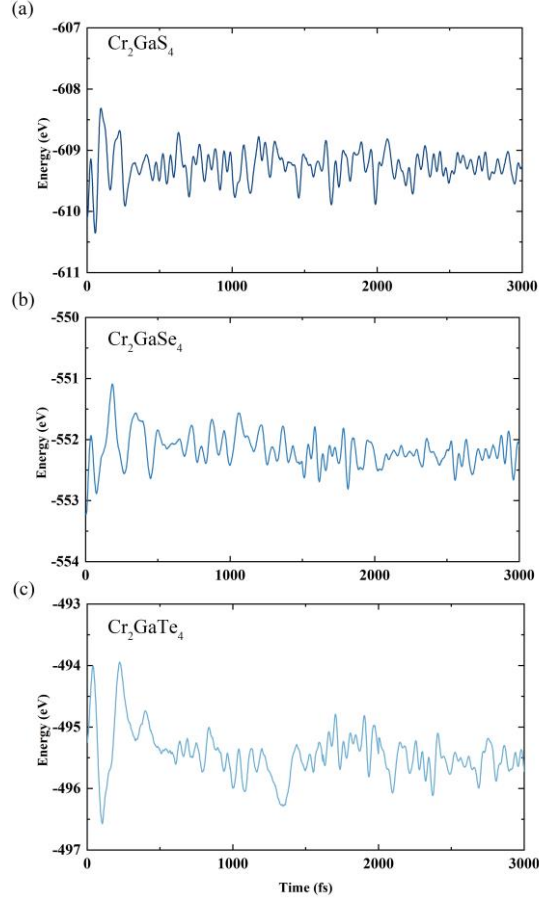

Figure S3: The evolution of total energy of the  $\text{Cr}_2\text{GaX}_4$  ( $X = \text{S}, \text{Se}, \text{Te}$ ) monolayers as a function of time at 300 K.

Table S2: Test calculation results of the band gaps (eV) on the spin-down channel and MAE (meV/Cr) of  $\text{Cr}_2\text{GaX}_4$  ( $X = \text{S}, \text{Se}, \text{Te}$ ) monolayers whether the van der Waals corrections are adopted with the density functional dispersion correction (DFT-D3).

|                            |          |      |
|----------------------------|----------|------|
| $\text{Cr}_2\text{GaS}_4$  | band gap | MAE  |
| without vdW                | 3.60     | 0.28 |
| with vdW                   | 3.69     | 0.29 |
| $\text{Cr}_2\text{GaSe}_4$ | band gap | MAE  |
| without vdW                | 3.21     | 0.55 |
| with vdW                   | 3.20     | 0.58 |
| $\text{Cr}_2\text{GaTe}_4$ | band gap | MAE  |
| without vdW                | 2.37     | 3.45 |
| with vdW                   | 2.35     | 3.47 |

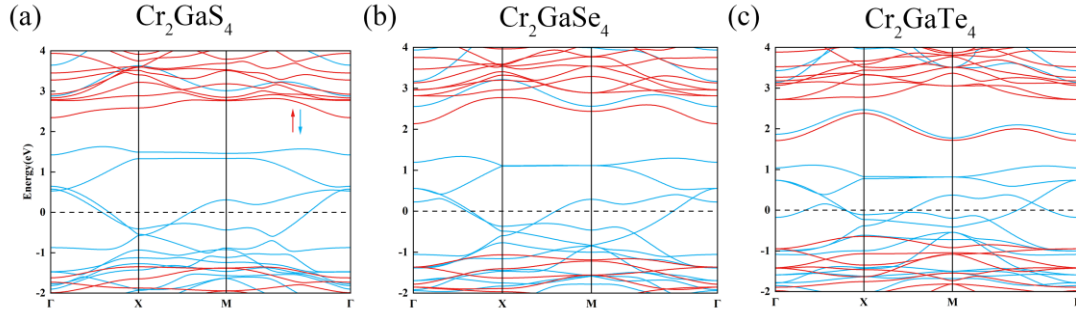

Figure S4: The electronic band structures of the  $\text{Cr}_2\text{GaX}_4$  ( $X = \text{S}, \text{Se}, \text{Te}$ ) monolayers for which the van der Waals corrections are adopted with DFT-D3.

Table S3: Test calculation results of the band gaps (eV) on the spin-down channel and MAE (meV/Cr) of  $\text{Cr}_2\text{GaX}_4$  ( $X = \text{S}, \text{Se}, \text{Te}$ ) monolayers with the different values of Hubbard  $U$ .

| $\text{Cr}_2\text{GaS}_4$  | band gap | MAE  |
|----------------------------|----------|------|
| $U = 3.0 \text{ eV}$       | 3.60     | 0.28 |
| $U = 3.5 \text{ eV}$       | 3.96     | 0.28 |
| $U = 4.0 \text{ eV}$       | 4.01     | 0.27 |
| $\text{Cr}_2\text{GaSe}_4$ | band gap | MAE  |
| $U = 3.0 \text{ eV}$       | 3.21     | 0.55 |
| $U = 3.5 \text{ eV}$       | 3.25     | 0.52 |
| $U = 4.0 \text{ eV}$       | 3.28     | 0.54 |
| $\text{Cr}_2\text{GaTe}_4$ | band gap | MAE  |
| $U = 3.0 \text{ eV}$       | 2.37     | 3.45 |
| $U = 3.5 \text{ eV}$       | 2.38     | 3.42 |
| $U = 4.0 \text{ eV}$       | 2.38     | 3.28 |

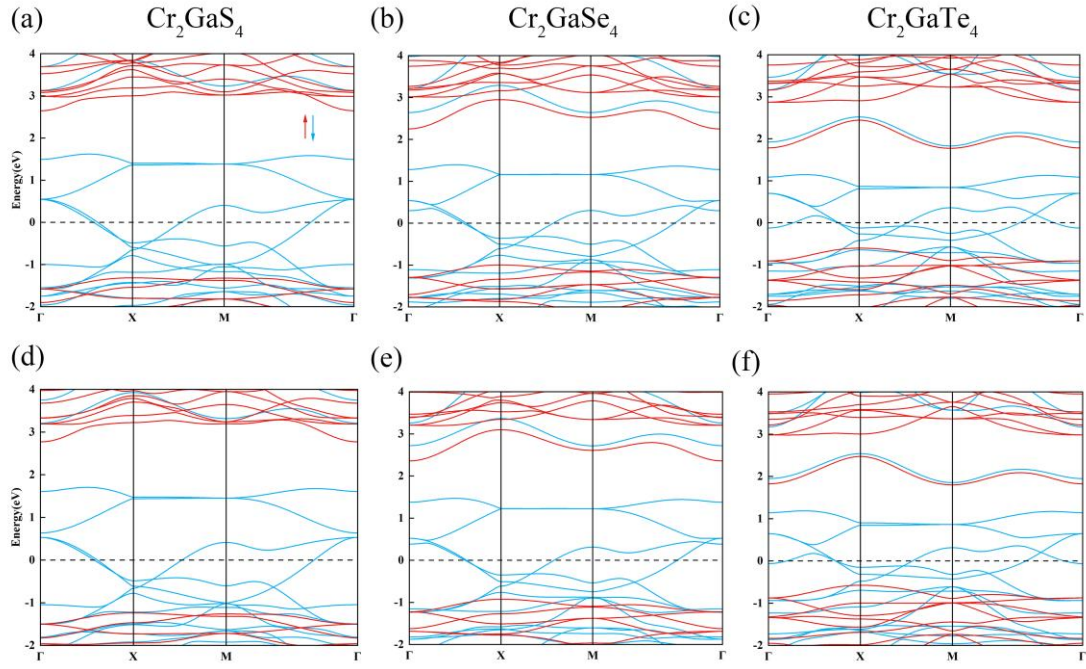

Figure S5: The electronic band structures of the  $\text{Cr}_2\text{GaX}_4$  ( $X = \text{S}, \text{Se}, \text{Te}$ ) monolayers, which the values of Hubbard  $U$  are set to (a-c) 3.5 and (d-f) 4.0 eV.

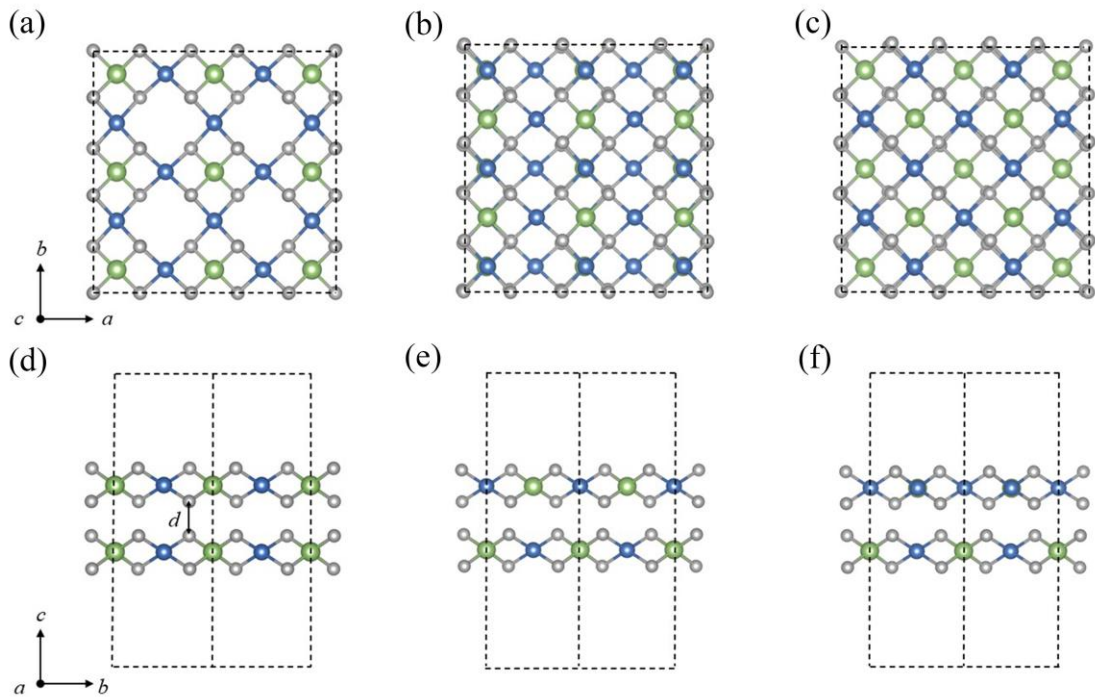

Figure S6: The  $\text{Cr}_2\text{GaX}_4$  ( $X = \text{S}, \text{Se}, \text{Te}$ ) bilayers with AA, AB-I, and AB-II stacking. (a-c) Top and (d-f) side views of the optimized structures.

Table S4: The optimized lattice constants ( $L$ , Å) and layer distances ( $d$ , Å) of the  $\text{Cr}_2\text{GaX}_4$  ( $X = \text{S}, \text{Se}, \text{Te}$ ) bilayers.

| $\text{Cr}_2\text{GaS}_4$ | $L$  | $d$  |
|---------------------------|------|------|
| AA                        | 6.08 | 3.63 |
| AB-I                      | 6.08 | 3.58 |
| AB-II                     | 6.08 | 3.66 |

  

| $\text{Cr}_2\text{GaSe}_4$ | $L$  | $d$  |
|----------------------------|------|------|
| AA                         | 6.33 | 3.74 |
| AB-I                       | 6.33 | 3.66 |
| AB-II                      | 6.34 | 3.76 |

  

| $\text{Cr}_2\text{GaTe}_4$ | $L$  | $d$  |
|----------------------------|------|------|
| AA                         | 6.72 | 3.99 |
| AB-I                       | 6.69 | 3.82 |
| AB-II                      | 6.69 | 3.90 |

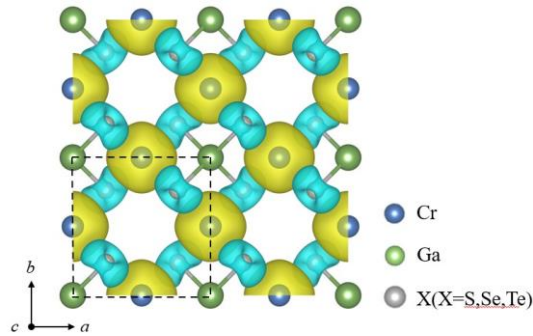

Figure S7: Top view of spin charge density for  $\text{Cr}_2\text{GaX}_4$  ( $X = \text{S}, \text{Se}, \text{Te}$ ) with iso-surface values of  $0.002 \text{ e bohr}^{-3}$ . The yellow and cyan colors represent spin-up and spin-down charge accumulation, respectively.

Table S5: The charge transfer ( $Q$ , e) by the Bader charge analysis. The negative and positive represent the gain and loss of electrons, respectively.

|                            | $Q_{\text{Cr}}$ | $Q_{\text{Ga}}$ | $Q_{\text{X}}$ |
|----------------------------|-----------------|-----------------|----------------|
| $\text{Cr}_2\text{GaS}_4$  | 1.41            | 0.90            | -1.02          |
| $\text{Cr}_2\text{GaSe}_4$ | 1.11            | 1.31            | -0.77          |
| $\text{Cr}_2\text{GaTe}_4$ | 0.87            | 0.58            | -0.58          |

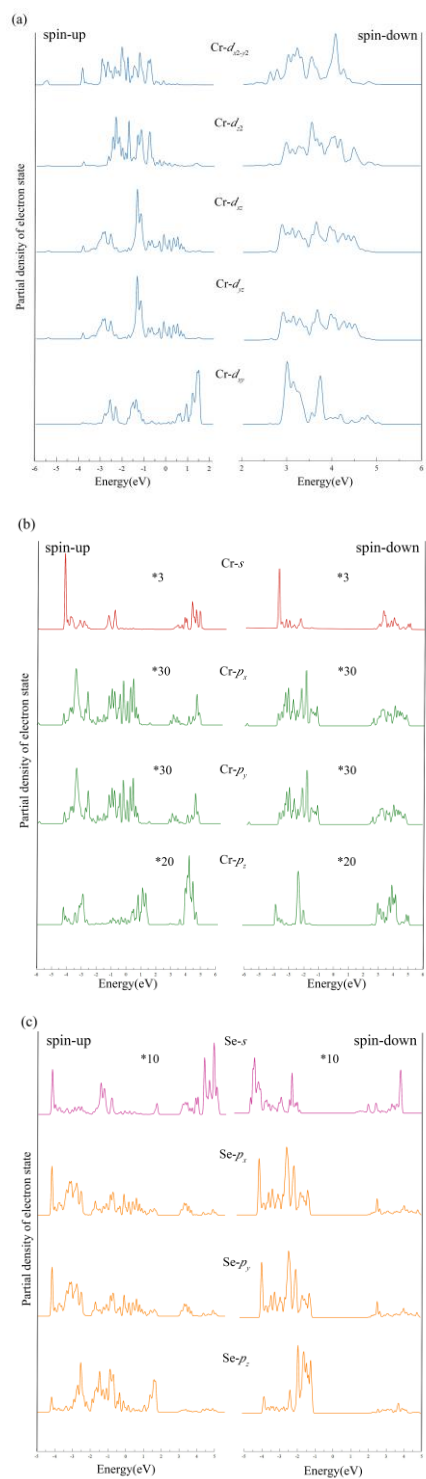

Figure S8: Partial density of electron state (PDOS) of Cr and Se atoms in  $\text{Cr}_2\text{GaSe}_4$  monolayer. Spin-up and spin-down channels are from left to right. The smaller PDOS are multiplied by appropriate times to gain clear discrimination.
